# Supplementary material for: Physiological Disturbance in Fatty Liver Energy Metabolism Converges on IGFBP2 Abundance and Regulation in Mice and Men
Source: Int J Mol Sci. 2020 Jun 10;21(11):4144. doi: 10.3390/ijms21114144 (PMC7312731; doi:10.3390/ijms21114144)
Supplement: Supplementary file 1 [file ijms-21-04144-s001.pdf]

# Physiological Disturbance in Fatty Liver Energy Metabolism Converges on IGFBP2 Abundance and Regulation in Mice and Men

Pia Fahlbusch, Birgit Knebel, Tina Hörbelt, David Monteiro Barbosa, Aleksandra Nikolic, Sylvia Jacob, Hadi Al-Hasani, Frederique Van de Velde, Yves Van Nieuwenhove, Dirk Müller-Wieland, Bruno Lapauw, D. Margriet Ouwens and Jorg Kotzka

Table S1. Mouse characteristics.

| Variable                   | C57Bl6           | alb-SREBP-1c         | aP2-SREBP-1c             | <i>p</i> |
|----------------------------|------------------|----------------------|--------------------------|----------|
| n                          | 8                | 8                    | 8                        |          |
| Age, weeks                 | 24               | 24                   | 24                       |          |
| Bodyweight, g              | 31.7 (28.9–34.6) | 36.1 (34.9–37.2) **  | 39.1 (36.6–41.5) ***,#   | <0.001   |
| Liver weight, g            | 1.58 (1.43–1.72) | 1.96 (1.84–2.08)     | 3.81 (3.06–4.57) ***,### | <0.001   |
| Liver weight, % bodyweight | 4.96 (4.91–5.73) | 5.44 (5.04–5.83)     | 9.81 (7.85–11.8) ***,### | <0.001   |
| Liver fat, % liver weight  | 1.51 (1.37–1.65) | 3.37 (3.08–3.66) *** | 5.35 (4.66–6.05) ***,### | <0.001   |
| Plasma glucose, mg/dL      | 127 (114–139)    | 142 (135–149)        | 233 (213–253) ***,###    | <0.001   |
| Plasma insulin, U/L        | 0.92 (0.69–1.15) | 4.13 (2.51–5.74) *** | 7.41 (5.98–8.83) ***,### | <0.001   |
| HOMA-IR                    | 0.29 (0.21–0.37) | 1.44 (0.89–1.99) **  | 4.27 (3.34–5.20) ***,### | <0.001   |
| Triglycerides, mmol/L      | 113 (92.8–133)   | 255 (211–300) ***    | 316 (277–354) ***,#      | <0.001   |
| Cholesterol, mmol/L        | 106 (92.6–120)   | 125 (116–134) *      | 127 (114–140) *          | 0.018    |
| Free fatty acids, mmol/L   | 1.09 (0.88–1.29) | 2.50 (2.16–2.83) *** | 3.38 (2.64–4.12) ***,### | <0.001   |
| ALT, U/L                   | 30.1 (26.8–33.5) | 58.5 (48.9–68.1)     | 154 (114–195) ***,###    | <0.001   |
| AST, U/L                   | 30.3 (21.6–38.9) | 60.8 (47.1–74.4)     | 279 (213–344) ***,###    | <0.001   |
| GLDH, U/L                  | 8.03 (6.03–10.0) | 14.4 (6.17–22.7)     | 25.8 (18.0–33.5) ***,#   | <0.001   |

Data are presented as mean ( $\pm$ 95% CI). Differences among the groups were calculated by ANOVA followed by Sidak correction for multiple comparisons. \*\*\*, \*\*, \* indicate  $p < 0.001$ ,  $p < 0.01$ , and  $p < 0.05$  versus C57Bl6 mice, ###, and # indicate  $p < 0.001$  and  $p < 0.05$  versus alb-SREBP-1c mice. HOMA-IR: Homeostatic model assessment for insulin resistance; ALT: alanine aminotransferase; AST: aspartate aminotransferase; GLDH: glutamate dehydrogenase; SREBP-1c: sterol regulatory element-binding protein-1c.

**Table S2.** Patient characteristics HepOBSTER cohort. Control men without obesity (Control) and class III obese men with and without type 2 diabetes and NAFLD (NAFL and NASH).

| Variable                           | Control          | NAFL                 | NASH                 | <i>p</i> |
|------------------------------------|------------------|----------------------|----------------------|----------|
| n                                  | 36               | 22                   | 40                   |          |
| Type 2 diabetes, n                 | 0 (0%)           | 4 (18%)              | 20 (50%)             |          |
| Age, years                         | 46.2 (41.9–50.6) | 42.5 (37.0–48.0)     | 45.9 (42.9–48.9)     | 0.434    |
| Body mass index, kg/m <sup>2</sup> | 25.0 (23.4–26.6) | 44.3 (41.5–47.1) *** | 40.6 (39.0–42.1) *** | <0.001   |
| NAFLD activity score               | 0                | 1–3                  | 3–7                  |          |
| Fatty liver index                  | 45.8 (31.6–56.0) | 99.0 (98.6–99.4) *** | 98.4 (97.5–99.5) *** | <0.001   |
| Fasting glucose, mmol/L            | 5.11 (4.74–5.47) | 6.09 (4.70–7.48)     | 6.63 (5.93–7.34) **  | 0.002    |
| Fasting insulin, pmol/L            | 36.9 (29.7–44.1) | 97.7 (70.5–125) ***  | 160 (92.8–226) ***   | <0.001   |
| HOMA-IR                            | 1.20 (0.95–1.46) | 3.41 (1.60–5.21) *** | 8.32 (1.12–15.5) *** | <0.001   |
| Free fatty acids, mmol/L           | 0.70 (0.57–0.83) | 0.59 (0.51–0.66)     | 0.63 (0.57–0.69)     | 0.263    |
| Triglycerides, mg/dL               | 142 (118–165)    | 190 (166–214) *      | 244 (175–313) ***    | <0.001   |
| Cholesterol, mg/dL                 | 181 (170–193)    | 186 (174–198)        | 175 (157–192)        | 0.100    |
| HDL-cholesterol, mg/dL             | 46.7 (42.2–51.3) | 37.4 (32.8–41.9) **  | 34.3 (29.9–38.6) *** | <0.001   |
| LDL-cholesterol, mg/dL             | 104 (93.0–114)   | 105 (91.5–118)       | 87.9 (78.5–97.3) *#  | 0.019    |
| ALT, IU/L                          | 29.4 (22.0–36.9) | 44.6 (35.9–53.2) *   | 53.5 (42.3–64.7) *** | <0.001   |
| AST, IU/L                          | 25.3 (21.6–29.0) | 28.0 (23.4–32.6)     | 37.5 (28.5–46.4) **  | 0.002    |
| γGT, IU/L                          | 29.3 (22.0–36.6) | 44.6 (35.9–53.2) *   | 53.5 (42.3–64.7) *** | <0.001   |

Data are presented as mean ( $\pm$ 95% CI). Differences among the groups were calculated by ANOVA followed by Sidak correction for multiple comparisons. \*\*\*, \*\*, \* indicate  $p < 0.001$ ,  $p < 0.01$ , and  $p < 0.05$  versus normal-weight control men; # indicates  $p < 0.05$  versus NAFL. ALT: alanine aminotransferase; AST: aspartate aminotransferase; BMI: body mass index; γGT: γ-glutamyltransferase; HDL: high density lipoprotein; HOMA-IR: Homeostatic model assessment for insulin resistance; LDL: low density lipoprotein; NAFL: non-alcoholic fatty liver; NASH: non-alcoholic steatohepatitis.

**Table S3.** Exploratory Pearson analysis for IGFBP2 serum levels in HepOBSTER cohort.

| Variable          | IGFBP2                    |
|-------------------|---------------------------|
| n                 | 98                        |
| Age, years        | <b>0.302 (0.002)</b>      |
| Body mass index   | <b>–0.676 (&lt;0.001)</b> |
| Fatty liver index | <b>–0.611 (&lt;0.001)</b> |
| Fasting glucose   | –0.152 (0.135)            |
| Fasting insulin   | <b>–0.343 (0.001)</b>     |
| HOMA-IR           | <b>–0.304 (0.006)</b>     |
| Free fatty acids  | <b>0.226 (0.043)</b>      |
| Triglycerides     | <b>–0.382 (&lt;0.001)</b> |
| Cholesterol       | 0.033 (0.748)             |
| HDL-cholesterol   | <b>0.406 (&lt;0.001)</b>  |
| LDL-cholesterol   | 0.113 (0.284)             |
| ALT               | <b>–0.467 (&lt;0.001)</b> |
| AST               | <b>–0.277 (0.006)</b>     |
| γGT               | <b>–0.460 (&lt;0.001)</b> |

The data are presented as Pearson's  $r$  ( $p$ ). Variables with a skewed distribution were log-transformed prior to the analysis. ALT: alanine aminotransferase; AST: aspartate aminotransferase; γGT: γ-glutamyltransferase; HDL: high density lipoprotein; HOMA-IR: Homeostatic model assessment for insulin resistance; LDL: low density lipoprotein. Significant parameters are indicated in bold.

**Table S4.** Multivariate regression analysis for IGFBP2 serum levels in HepOBSTER cohort.

| Variable          | Not adjusted              | Age                       | Age + BMI             |
|-------------------|---------------------------|---------------------------|-----------------------|
| Body mass index   | <b>-0.676 (&lt;0.001)</b> | <b>-0.656 (&lt;0.001)</b> | n.a.                  |
| Fatty liver index | <b>-0.611 (&lt;0.001)</b> | <b>-0.568 (&lt;0.001)</b> | <b>-0.358 (0.030)</b> |
| Fasting insulin   | <b>-0.343 (0.001)</b>     | <b>-0.345 (&lt;0.001)</b> | 0.069 (0.445)         |
| HOMA-IR           | <b>-0.297 (0.008)</b>     | <b>-0.262 (0.013)</b>     | 0.135 (0.146)         |
| Free fatty acids  | <b>0.226 (0.043)</b>      | 0.210 (0.058)             | 0.158 (0.083)         |
| Triglycerides     | <b>-0.382 (&lt;0.001)</b> | <b>-0.402 (&lt;0.001)</b> | <b>-0.163 (0.039)</b> |
| HDL-cholesterol   | <b>0.406 (&lt;0.001)</b>  | <b>0.382 (&lt;0.001)</b>  | 0.128 (0.110)         |
| ALT               | <b>-0.467 (&lt;0.001)</b> | <b>-0.419 (&lt;0.001)</b> | <b>-0.201 (0.010)</b> |
| AST               | <b>-0.277 (0.006)</b>     | <b>-0.260 (0.007)</b>     | -0.132 (0.072)        |
| $\gamma$ GT       | <b>-0.460 (&lt;0.001)</b> | <b>-0.413 (&lt;0.001)</b> | <b>-0.202 (0.011)</b> |

The data are  $\beta$  (p). Variables with a skewed distribution were log-transformed prior to the analysis. ALT: alanine aminotransferase; AST: aspartate aminotransferase;  $\gamma$ GT:  $\gamma$ -glutamyltransferase; HDL: high density lipoprotein; HOMA-IR: Homeostatic model assessment for insulin resistance; LDL: low density lipoprotein. Significant parameters are indicated in bold.

**Table S5.** Intervention study Obster cohort. Obese men prior to (pre) and 2 years after bariatric surgery (post).

| Variable                           | Pre                 | Post                | <i>p</i> |
|------------------------------------|---------------------|---------------------|----------|
| n                                  | 15                  | 15                  |          |
| Age, years                         | 51.1 (44.6–57.6)    | 53.3 (46.9–59.8)    | <0.001   |
| Body mass index, kg/m <sup>2</sup> | 44.1 (39.7–48.5)    | 34.3 (29.9–38.7)    | <0.001   |
| Fatty liver index                  | 97.7 (95.2–100.1)   | 71.7 (54.0–89.3)    | 0.005    |
| Fasting glucose, mmol/L            | 6.45 (5.5–7.4)      | 5.45 (5.0–5.9)      | 0.068    |
| Fasting insulin, pmol/L            | 164.6 (110.1–219.0) | 89.6 (45.7–133.6)   | 0.001    |
| HOMA-IR                            | 7.29 (4.4–1.6)      | 3.4 (1.6–5.2)       | 0.003    |
| Triglycerides, mmol/L              | 149.3 (104.1–194.5) | 103.9 (76.2–131.5)  | 0.037    |
| Cholesterol, mmol/L                | 164.9 (148.0–181.7) | 167.9 (148.1–187.7) | 0.710    |
| HDL-cholesterol, mmol/L            | 42.4 (36.9–47.9)    | 59.6 (51.6–67.7)    | <0.001   |
| LDL-cholesterol, mmol/L            | 92.1 (77.8–106.5)   | 86.7 (70.3–103.2)   | 0.540    |
| ALT, IU/L                          | 64.9 (36.0–93.8)    | 31.5 (23.3–39.6)    | 0.028    |
| AST, IU/L                          | 41.7 (28.0–55.4)    | 28.9 (20.8–37.1)    | 0.045    |
| $\gamma$ GT, IU/L                  | 44.7 (18.3–71.0)    | 35.5 (17.1–54.0)    | 0.511    |

Data are presented as mean ( $\pm$ 95% CI). Differences among the groups were calculated by paired *t*-test. ALT: alanine aminotransferase; AST: aspartate aminotransferase;  $\gamma$ GT:  $\gamma$ -glutamyltransferase; HDL: high density lipoprotein; HOMA-IR: Homeostatic model assessment for insulin resistance; LDL: low density lipoprotein.

## A C57Bl6 vs. alb-SREBP-1c

| Top Regulator Effect Networks |                              |                                                              |
|-------------------------------|------------------------------|--------------------------------------------------------------|
| ID                            | Regulators                   | Diseases & Functions                                         |
| 1                             | CSF2,CSF3,EPO,IL1B,MYD88,TNF | Endocytosis by eukaryotic cells (+5 more)                    |
| 2                             | IL27,MYD88                   | Activation of blood cells,Hepatocellular carcinoma (+1 more) |
| 3                             | AKT1                         | Activation of blood cells                                    |
| 4                             | TP53                         | Quantity of metal ion                                        |
| 5                             | CSF2                         | Organismal death                                             |
|                               |                              | Consistency Score                                            |
|                               |                              | 17,5                                                         |
|                               |                              | 4,536                                                        |
|                               |                              | -4,919                                                       |
|                               |                              | -11,023                                                      |
|                               |                              | -14,496                                                      |

## B C57Bl6 vs. aP2-SREBP-1c

| Top Regulator Effect Networks |                                       |                                                   |
|-------------------------------|---------------------------------------|---------------------------------------------------|
| ID                            | Regulators                            | Diseases & Functions                              |
| 1                             | TFEB                                  | Degeneration of central nervous system (+3 more)  |
| 2                             | 26s Proteasome,SIRT6,TFEB             | Biosynthesis of nucleoside triphosphate (+4 more) |
| 3                             | 26s Proteasome,Akt,SIRT6,TARDBP,TRAP1 | Biosynthesis of nucleoside triphosphate (+2 more) |
| 4                             | INSR,MAPK9,PCGEM1                     | Metabolism of membrane lipid derivative (+1 more) |
| 5                             | MYC                                   | Regeneration of liver                             |
|                               |                                       | Consistency Score                                 |
|                               |                                       | 6,718                                             |
|                               |                                       | 5,578                                             |
|                               |                                       | 4,131                                             |
|                               |                                       | 2,593                                             |
|                               |                                       | 1,89                                              |

## C alb-SREBP-1c vs. aP2-SREBP-1c

| Top Regulator Effect Networks |                                              |                                                          |
|-------------------------------|----------------------------------------------|----------------------------------------------------------|
| ID                            | Regulators                                   | Diseases & Functions                                     |
| 1                             | IGFBP2                                       | Anemia,Cell viability of tumor cell lines (+5 more)      |
| 2                             | TFEB                                         | Ataxia,Autophagy,Degeneration of cells (+4 more)         |
| 3                             | ATF4,CYP3A,EIF4E,FOXO1,HRAS,IFNA2,LGR4,NR0B2 | Cholesterol transport (+4 more)                          |
| 4                             | ATF4,CYP3A,IgG,NR0B2,SYVN1                   | Ataxia,Cholesterol transport (+7 more)                   |
| 5                             | SIRT6                                        | Cell viability,Dysglycemia,Insulin sensitivity (+3 more) |
|                               |                                              | Consistency Score                                        |
|                               |                                              | 10,436                                                   |
|                               |                                              | 9,071                                                    |
|                               |                                              | 8,598                                                    |
|                               |                                              | 7,667                                                    |
|                               |                                              | 7,483                                                    |

**Figure S1.** Summary of the 5 top score regulator effect networks from transcriptome analysis of C57Bl6, alb-SREBP-1c and aP2-SREBP-1c liver tissue. Data sets were analyzed with knowledge based IPA® software to identify most consistent networks of regulated gene expression found in comparison of C57Bl6 vs. (A) alb-SREBP-1c or (B) aP2-SREBP-1c as well as (C) alb-SREBP-1c vs. aP2-SREBP-1c.

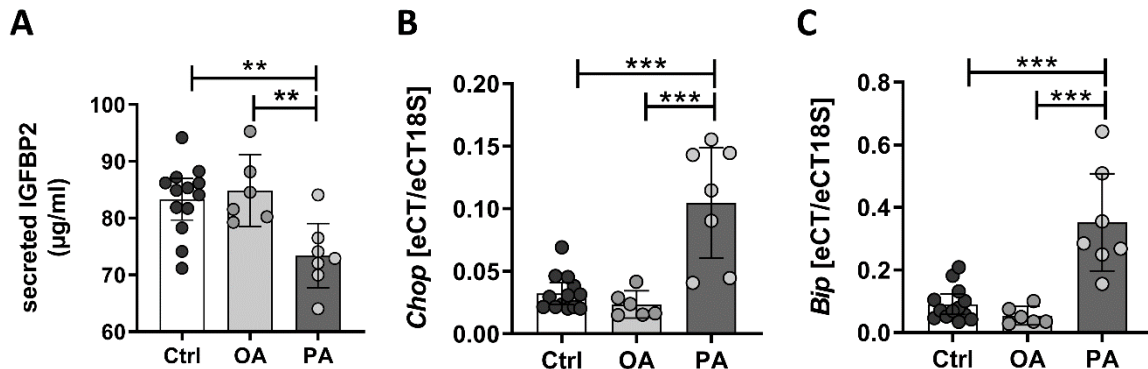

**Figure S2.** Effects of free fatty acids on metabolically healthy C57Bl6 hepatocytes. (A) Concentration of IGFBP2 secretion into culture supernatant from C57Bl6 primary hepatocytes treated with 500  $\mu$ M BSA-conjugated palmitate (PA), oleate (OA) or the respective amount of BSA alone (Ctrl) in 48 h culture, followed by analysis of (B) *Chop* and (C) *Bip* mRNA expression. The bar graphs are mean ( $\pm$ 95% CI) of 6–7 independent experiments. Statistical differences were calculated by ANOVA followed by Sidak correction for multiple comparisons. \*\*, \*\*\* indicate  $p < 0.01$  and  $p < 0.001$  for labeled comparisons.

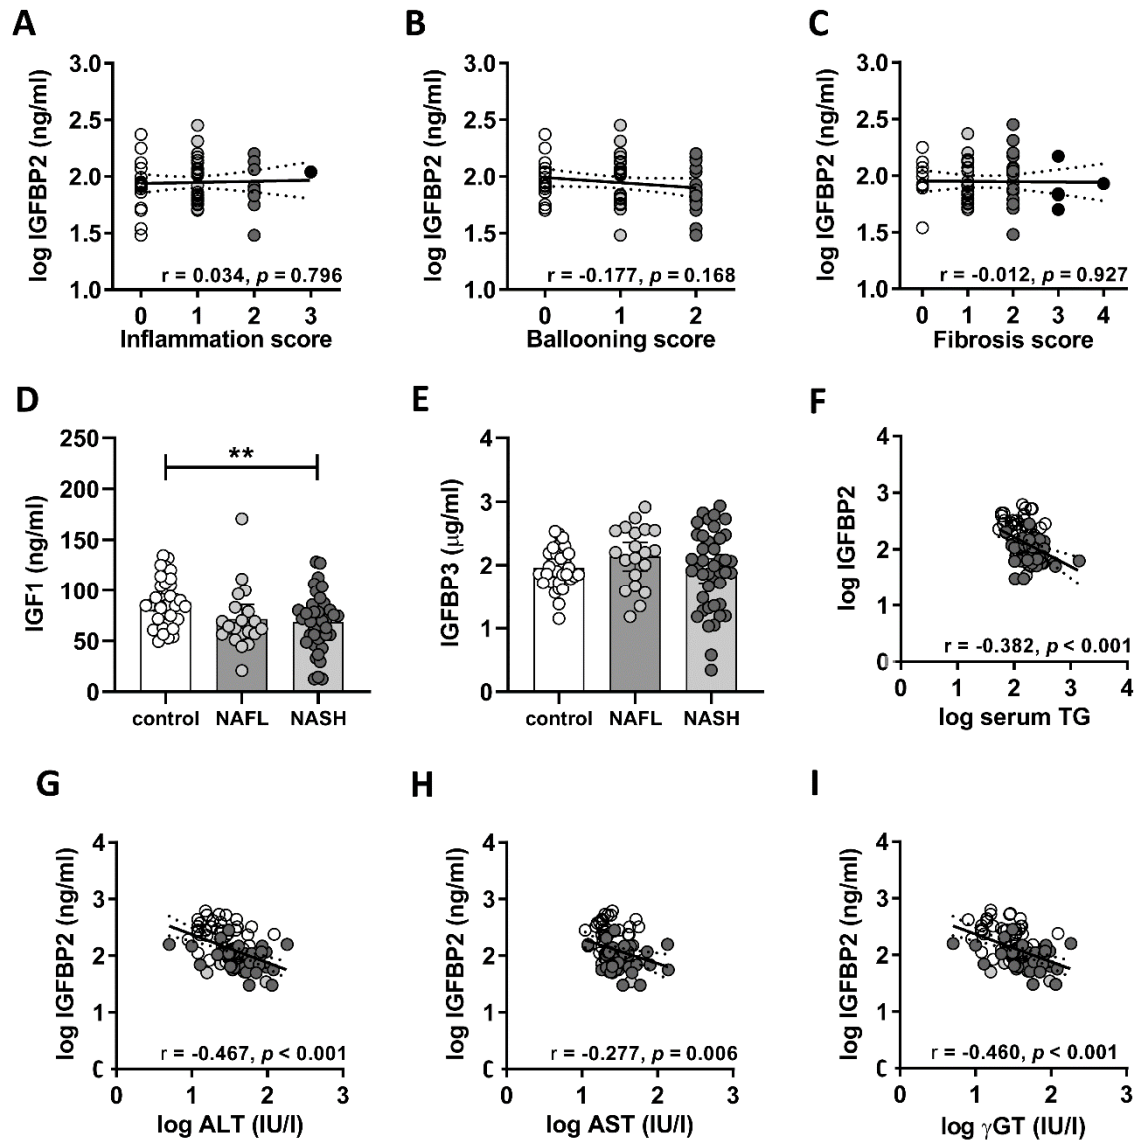

**Figure S3.** Correlates of circulating IGFBP2 in HepOBSTER cohort. Scatter plots show correlates between circulating IGFBP2 and (A) inflammation, (B) ballooning and (C) fibrosis score, (F) serum triglycerides (TG), (G) ALT, (H) AST, and (I)  $\gamma$ GT. Bar graphs present circulating (D) IGF1 and IGFBP3 (E) levels in HepOBSTER cohort. Bar graphs show mean ( $\pm$ 95% CI), scatter plots show regression lines ( $\pm$ 95% CI, dashed lines). Statistical differences were calculated by ANOVA followed by Sidak correction for multiple comparisons. \*\* indicate  $p < 0.01$  for labeled comparison. Pearson's  $r$  and  $p$ -values are shown for correlation analysis.
